# Supplementary material for: Equally low blood metal ion levels at 10-years follow up of total hip arthroplasties with Oxinium, CoCrMo and stainless steel femoral heads. Data from a randomized clinical trial
Source: bioRxiv or medRxiv preprint supplement (doi:10.1101/2022.04.04.22273159), 2022-04-05
Supplement: Supplementary file [file media-1.pdf]

**Supplement 1.** Overview of included study patients (n=81) with their study prosthesis (femoral stem, head and cup) grouped by femoral head material. Further columns list additional hip stems (SS=stainless steel), knee and shoulder prostheses implanted either before or within the 10-year study period.

| Patient | Stem                | Head material         | Cup                        | 2nd hip stem (stem material)  | 1st knee               | 2nd knee        | Shoulder             |
|---------|---------------------|-----------------------|----------------------------|-------------------------------|------------------------|-----------------|----------------------|
| 1       | Charnley flanged 40 | Stainless steel, 316L | Charnley Ogee UHMWPE       | LUBINUS SP II (CoCrMo)        |                        |                 |                      |
| 2       | Charnley flanged 40 | Stainless steel, 316L | Charnley Ogee UHMWPE       | PROFILE (TiAlV)               | Genesis I (CoCr/TiAlV) |                 |                      |
| 3       | Charnley flanged 40 | Stainless steel, 316L | Charnley Ogee UHMWPE       |                               |                        |                 |                      |
| 4       | Charnley flanged 40 | Stainless steel, 316L | Charnley Ogee UHMWPE       |                               |                        |                 |                      |
| 5       | Charnley flanged 40 | Stainless steel, 316L | Charnley Ogee UHMWPE       | CHARNLEY (SS)                 | PROFIX (CoCrMo)        | PROFIX (CoCrMo) |                      |
| 6       | Charnley flanged 40 | Stainless steel, 316L | Charnley Ogee UHMWPE       | LUBINUS SP II (CoCrMo)        |                        |                 |                      |
| 7       | Charnley flanged 40 | Stainless steel, 316L | Charnley Ogee UHMWPE       |                               | PROFIX (CoCrMo)        |                 |                      |
| 8       | Charnley flanged 40 | Stainless steel, 316L | Charnley Ogee UHMWPE       | LUBINUS SP II (CoCrMo)        |                        |                 |                      |
| 9       | Charnley flanged 40 | Stainless steel, 316L | Charnley Ogee UHMWPE       | LUBINUS SP II (CoCrMo)        |                        |                 |                      |
| 10      | Charnley flanged 40 | Stainless steel, 316L | Charnley Ogee UHMWPE       | LUBINUS SP II (CoCrMo)        |                        |                 |                      |
| 11      | Charnley flanged 40 | Stainless steel, 316L | Charnley Ogee UHMWPE       |                               | LCS (CoCrMo)           |                 |                      |
| 12      | Charnley flanged 40 | Stainless steel, 316L | Charnley Ogee UHMWPE       |                               |                        |                 |                      |
| 13      | Charnley flanged 40 | Stainless steel, 316L | Charnley Ogee UHMWPE       |                               |                        |                 |                      |
| 14      | Charnley flanged 40 | Stainless steel, 316L | Charnley Ogee UHMWPE       | ELITE (CoCrMo)                |                        |                 |                      |
| 15      | Charnley flanged 40 | Stainless steel, 316L | Charnley Ogee UHMWPE       | LUBINUS SP II (CoCrMo)        |                        |                 |                      |
| 16      | Charnley flanged 40 | Stainless steel, 316L | Charnley Ogee UHMWPE       | LUBINUS SP II (CoCrMo)        |                        |                 |                      |
| 17      | Charnley flanged 40 | Stainless steel, 316L | Charnley Ogee UHMWPE       |                               |                        |                 |                      |
| 18      | Spectron EF         | CoCrMoMo              | Reflection All-Poly UHMWPE |                               |                        |                 |                      |
| 19      | Spectron EF         | CoCrMoMo              | Reflection All-Poly UHMWPE | LUBINUS SP II (CrCo)          | LCS (CoCrMo)           |                 |                      |
| 20      | Spectron EF         | CoCrMoMo              | Reflection All-Poly UHMWPE |                               |                        |                 |                      |
| 21      | Spectron EF         | CoCrMoMo              | Reflection All-Poly UHMWPE | LUBINUS SP II (CoCrMo)        | PROFIX (CoCrMo)        | PROFIX (CoCrMo) |                      |
| 22      | Spectron EF         | CoCrMoMo              | Reflection All-Poly UHMWPE |                               |                        |                 |                      |
| 23      | Spectron EF         | CoCrMoMo              | Reflection All-Poly UHMWPE | LUBINUS SP II (CoCrMo)        |                        |                 |                      |
| 24      | Spectron EF         | CoCrMoMo              | Reflection All-Poly UHMWPE | LUBINUS SP II (CoCrMo)        |                        |                 |                      |
| 25      | Spectron EF         | CoCrMoMo              | Reflection All-Poly UHMWPE | SPECTRON-EF (CoCrMo)          |                        |                 |                      |
| 26      | Spectron EF         | CoCrMoMo              | Reflection All-Poly UHMWPE | SPECTRON-EF (CoCrMo)          |                        |                 |                      |
| 27      | Spectron EF         | CoCrMoMo              | Reflection All-Poly UHMWPE |                               |                        |                 |                      |
| 28      | Spectron EF         | CoCrMoMo              | Reflection All-Poly UHMWPE | LUBINUS SP II (CoCrMo)        |                        |                 |                      |
| 29      | Spectron EF         | CoCrMoMo              | Reflection All-Poly UHMWPE |                               |                        |                 |                      |
| 30      | Spectron EF         | CoCrMoMo              | Reflection All-Poly UHMWPE | LUBINUS SP II (CoCrMo)        |                        |                 |                      |
| 31      | Spectron EF         | CoCrMoMo              | Reflection XLPE            |                               |                        |                 |                      |
| 32      | Spectron EF         | CoCrMoMo              | Reflection XLPE            | LUBINUS SP II (CoCrMo)        |                        |                 |                      |
| 33      | Spectron EF         | CoCrMoMo              | Reflection XLPE            |                               |                        |                 | Global Adv. (CoCrMo) |
| 34      | Spectron EF         | CoCrMoMo              | Reflection XLPE            | SPECTRON-EF (CoCrMo)          |                        |                 |                      |
| 35      | Spectron EF         | CoCrMoMo              | Reflection XLPE            | CHARNLEY (SS)                 |                        |                 |                      |
| 36      | Spectron EF         | CoCrMoMo              | Reflection XLPE            |                               |                        |                 |                      |
| 37      | Spectron EF         | CoCrMoMo              | Reflection XLPE            | SPECTRON-EF (CoCrMo)          |                        |                 |                      |
| 38      | Spectron EF         | CoCrMoMo              | Reflection XLPE            |                               |                        |                 |                      |
| 39      | Spectron EF         | CoCrMoMo              | Reflection XLPE            | LUBINUS SP II (CoCrMo)        |                        |                 |                      |
| 40      | Spectron EF         | CoCrMoMo              | Reflection XLPE            | LUBINUS SP II (CrCo)          |                        |                 |                      |
| 41      | Spectron EF         | CoCrMoMo              | Reflection XLPE            |                               |                        |                 |                      |
| 42      | Spectron EF         | CoCrMoMo              | Reflection XLPE            | CHARNLEY (SS)                 |                        |                 |                      |
| 43      | Spectron EF         | CoCrMoMo              | Reflection XLPE            |                               |                        |                 |                      |
| 44      | Spectron EF         | CoCrMoMo              | Reflection XLPE            |                               |                        |                 |                      |
| 45      | Spectron EF         | CoCrMoMo              | Reflection XLPE            | SPECTRON-EF (CoCrMo)          |                        |                 |                      |
| 46      | Spectron EF         | CoCrMoMo              | Reflection XLPE            |                               |                        |                 |                      |
| 47      | Spectron EF         | CoCrMoMo              | Reflection XLPE            | EXETER (SS)                   |                        |                 |                      |
| 48      | Spectron EF         | CoCrMoMo              | Reflection XLPE            | LUBINUS SP II (CoCrMo)        | NexGen (TiAlV)         | NexGen (TiAlV)  |                      |
| 49      | Spectron EF         | CoCrMoMo              | Reflection XLPE            | MS-30 (SS)                    |                        |                 |                      |
| 50      | Spectron EF         | Oxinium               | Reflection All-Poly UHMWPE |                               |                        |                 |                      |
| 51      | Spectron EF         | Oxinium               | Reflection All-Poly UHMWPE | SPECTRON-EF (CoCrMo)          | Genesis I (CoCr/TiAlV) |                 |                      |
| 52      | Spectron EF         | Oxinium               | Reflection All-Poly UHMWPE | PROFILE (TiAlV)               |                        |                 |                      |
| 53      | Spectron EF         | Oxinium               | Reflection All-Poly UHMWPE | Profile/Tri-lock plus (TiAlV) |                        |                 |                      |
| 54      | Spectron EF         | Oxinium               | Reflection All-Poly UHMWPE | TITAN (TiAlV)                 |                        |                 |                      |
| 55      | Spectron EF         | Oxinium               | Reflection All-Poly UHMWPE | SPECTRON-EF (CoCrMo)          |                        |                 |                      |
| 56      | Spectron EF         | Oxinium               | Reflection All-Poly UHMWPE |                               |                        |                 |                      |
| 57      | Spectron EF         | Oxinium               | Reflection All-Poly UHMWPE | EXETER (SS)                   |                        |                 | Global Adv. (CoCrMo) |
| 58      | Spectron EF         | Oxinium               | Reflection All-Poly UHMWPE | CHARNLEY (SS)                 |                        |                 |                      |
| 59      | Spectron EF         | Oxinium               | Reflection All-Poly UHMWPE |                               |                        |                 |                      |
| 60      | Spectron EF         | Oxinium               | Reflection All-Poly UHMWPE | LUBINUS SP II (CoCrMo)        |                        |                 |                      |
| 61      | Spectron EF         | Oxinium               | Reflection All-Poly UHMWPE |                               |                        |                 |                      |
| 62      | Spectron EF         | Oxinium               | Reflection All-Poly UHMWPE | SPECTRON-EF (CoCrMo)          |                        |                 |                      |
| 63      | Spectron EF         | Oxinium               | Reflection All-Poly UHMWPE |                               |                        |                 | Delta Xtend (CoCrMo) |
| 64      | Spectron EF         | Oxinium               | Reflection All-Poly UHMWPE | CORAIL (TiAlV)                | PROFIX (CoCrMo)        | NexGen (TiAlV)  |                      |
| 65      | Spectron EF         | Oxinium               | Reflection All-Poly UHMWPE | LUBINUS SP II (CoCrMo)        |                        |                 |                      |
| 66      | Spectron EF         | Oxinium               | Reflection All-Poly UHMWPE | LUBINUS SP II (CoCrMo)        |                        |                 |                      |
| 67      | Spectron EF         | Oxinium               | Reflection XLPE            |                               |                        |                 |                      |
| 68      | Spectron EF         | Oxinium               | Reflection XLPE            | EXETER (SS)                   | NexGen (TiAlV)         |                 |                      |
| 69      | Spectron EF         | Oxinium               | Reflection XLPE            | SPECTRON-EF (CoCrMo)          | LCS (CoCrMo)           |                 |                      |
| 70      | Spectron EF         | Oxinium               | Reflection XLPE            |                               |                        |                 |                      |
| 71      | Spectron EF         | Oxinium               | Reflection XLPE            | SPECTRON-EF (CoCrMo)          |                        |                 |                      |
| 72      | Spectron EF         | Oxinium               | Reflection XLPE            | SPECTRON-EF (CoCrMo)          |                        |                 |                      |
| 73      | Spectron EF         | Oxinium               | Reflection XLPE            | CHARNLEY (SS)                 |                        |                 | Global Adv. (CoCrMo) |
| 74      | Spectron EF         | Oxinium               | Reflection XLPE            | LUBINUS SP II (CoCrMo)        |                        |                 |                      |
| 75      | Spectron EF         | Oxinium               | Reflection XLPE            |                               | PROFIX (CoCrMo)        |                 |                      |
| 76      | Spectron EF         | Oxinium               | Reflection XLPE            |                               |                        |                 |                      |
| 77      | Spectron EF         | Oxinium               | Reflection XLPE            | LUBINUS SP II (CoCrMo)        |                        |                 |                      |
| 78      | Spectron EF         | Oxinium               | Reflection XLPE            | SPECTRON-EF (CoCrMo)          |                        |                 |                      |
| 79      | Spectron EF         | Oxinium               | Reflection XLPE            |                               |                        |                 |                      |
| 80      | Spectron EF         | Oxinium               | Reflection XLPE            | CHARNLEY (SS)                 |                        |                 |                      |
| 81      | Spectron EF         | Oxinium               | Reflection XLPE            |                               |                        |                 |                      |

**Supplement 2.** A comparison of the of the blood metal levels ( $\mu\text{g/l}$ ) in patients with only the study prosthesis (pooled) and those with additional prostheses (pooled). An independent samples Mann-Whitney U test was used to compare ranks.

|           | <b>Groups</b>         | <b>N</b> | <b>Medians<br/>(<math>\mu\text{g/l}</math>)</b> | <b>Mean ranks</b> | <b>p-value</b> |
|-----------|-----------------------|----------|-------------------------------------------------|-------------------|----------------|
| Chromium  | Only study prosthesis | 26       | 0.17                                            | 40.27             | 0.85           |
|           | Additional prostheses | 55       | 0.20                                            | 41.35             |                |
| Cobalt    | Only study prosthesis | 26       | 0.11                                            | 40.13             | 0.82           |
|           | Additional prostheses | 55       | 0.14                                            | 41.41             |                |
| Zirconium | Only study prosthesis | 26       | 0.07                                            | 35.58             | 0.15           |
|           | Additional prostheses | 55       | 0.19                                            | 43.56             |                |
| Nickel    | Only study prosthesis | 26       | 0.17                                            | 38.12             | 0.45           |
|           | Additional prostheses | 55       | 0.20                                            | 42.36             |                |
